# Supplementary material for: Yeast-derived N, P co-doped porous green carbon materials as metal-free catalysts for selective hydrogenation of chloronitrobenzene
Source: Royal Society of Chemistry journal article supplement (doi:10.1039/d4gc00993b), 2024-01-01
Supplement: d4gc00993b1.pdf [file d4gc00993b1.pdf]

*Electronic Supplementary Information (ESI)*

Table S1 the hydrogenation performance of nitrobenzene or halogenated nitrobenzene over metal-free carbon materials catalysts

| Catalysts                        | Substrate           | Product        | Hydrogen source                                 | T or P <sub>H<sub>2</sub></sub> (°C or MPa) | t(h) | Yield (%) | Ref. |
|----------------------------------|---------------------|----------------|-------------------------------------------------|---------------------------------------------|------|-----------|------|
| graphite                         | nitrobenzene        | aniline        | N <sub>2</sub> H <sub>4</sub> •H <sub>2</sub> O | /                                           | 2    | 95.0      | 1    |
| C <sub>60</sub>                  | nitrobenzene        | aniline        | H <sub>2</sub>                                  | 150/5                                       | 4    | 10.0      | 2    |
| AC                               | 3-nitrostyrene      | 3-aminostyrene | N <sub>2</sub> H <sub>4</sub> •H <sub>2</sub> O | 100                                         | 2    | 21.1      | 3    |
| AC-H <sub>2</sub> O <sub>2</sub> | 3-nitrostyrene      | 3-aminostyrene | N <sub>2</sub> H <sub>4</sub> •H <sub>2</sub> O | 100                                         | 2    | 56.3      | 3    |
| C <sub>60</sub> -EDAC            | ρ-CNB               | ρ-CAN          | N <sub>2</sub> H <sub>4</sub> •H <sub>2</sub> O | 100                                         | 2    | 99.0      | 4    |
| C <sub>60</sub> -EDAC            | o-CNB               | o-CAN          | N <sub>2</sub> H <sub>4</sub> •H <sub>2</sub> O | 100                                         | 2    | 99.0      | 4    |
| NC-950                           | ρ-CNB               | ρ-CAN          | N <sub>2</sub> H <sub>4</sub> •H <sub>2</sub> O | 90                                          | 4    | 93.4      | 5    |
| CNS-900                          | o-CNB               | o-CAN          | H <sub>2</sub>                                  | 140/5                                       | 24   | 100.0     | 6    |
| NSHC                             | ρ-CNB               | ρ-CAN          | N <sub>2</sub> H <sub>4</sub> •H <sub>2</sub> O | 100                                         | 4    | 93.1      | 7    |
| NSHC                             | ρ-bromonitrobenzene | ρ-bromoaniline | N <sub>2</sub> H <sub>4</sub> •H <sub>2</sub> O | 100                                         | 4    | 98.0      | 7    |
| NSHC                             | ρ-iodonitrobenzene  | ρ-iodoaniline  | N <sub>2</sub> H <sub>4</sub> •H <sub>2</sub> O | 100                                         | 4    | 93.0      | 7    |
| NPG                              | ρ-CNB               | ρ-CAN          | NaBH <sub>4</sub>                               | 35                                          | 2    | 98.5      | 8    |
| NPG                              | ρ-bromonitrobenzene | ρ-bromoaniline | NaBH <sub>4</sub>                               | 35                                          | 2    | 85.1      | 8    |
| g-C <sub>3</sub> N <sub>4</sub>  | m-CNB               | m-CAN          | N <sub>2</sub> H <sub>4</sub> •H <sub>2</sub> O | 90 (visible-light)                          | 18   | 88.0      | 9    |
| BNC                              | ρ-CNB               | ρ-CAN          | N <sub>2</sub> H <sub>4</sub> •H <sub>2</sub> O | 80                                          | 10   | 98.7      | 10   |
| NC-700                           | ρ-CNB               | ρ-CAN          | N <sub>2</sub> H <sub>4</sub> •H <sub>2</sub> O | 100                                         | 2.5  | 83.2      | 11   |
| NC-700                           | o-CNB               | o-CAN          | N <sub>2</sub> H <sub>4</sub> •H <sub>2</sub> O | 100                                         | 2    | 90.8      | 11   |
| NC-700                           | m-CNB               | m-CAN          | N <sub>2</sub> H <sub>4</sub> •H <sub>2</sub> O | 100                                         | 2    | 92.5      | 11   |
| ONPC                             | m-CNB               | m-CAN          | N <sub>2</sub> H <sub>4</sub> •H <sub>2</sub> O | 80                                          | 4    | 96.3      | 12   |
| ONPC                             | ρ-bromonitrobenzene | ρ-bromoaniline | N <sub>2</sub> H <sub>4</sub> •H <sub>2</sub> O | 80                                          | 4    | 90.2      | 12   |
| ONPC                             | ρ-iodonitrobenzene  | ρ-iodoaniline  | N <sub>2</sub> H <sub>4</sub> •H <sub>2</sub> O | 80                                          | 4    | 52.8      | 12   |
| PNC                              | ρ-CNB               | ρ-CAN          | N <sub>2</sub> H <sub>4</sub> •H <sub>2</sub> O | Xenon lamp                                  | 24   | 95.7      | 13   |
| N-CNT <sub>900</sub>             | nitrobenzene        | aniline        | H <sub>2</sub>                                  | 50/3                                        | 15   | <1.0      | 14   |
| N-CNT <sub>900</sub>             | nitrobenzene        | aniline        | H <sub>2</sub>                                  | 120/3                                       | 18   | 95.0      | 14   |
| P-CNT <sub>900</sub>             | ρ-CNB               | ρ-CAN          | H <sub>2</sub>                                  | 50/3                                        | 15   | 97.0      | 14   |
| P-CNT <sub>900</sub>             | ρ-bromonitrobenzene | ρ-bromoaniline | H <sub>2</sub>                                  | 50/3                                        | 15   | 94.0      | 14   |
| P-CNT <sub>900</sub>             | ρ-iodonitrobenzene  | ρ-iodoaniline  | H <sub>2</sub>                                  | 50/3                                        | 15   | 94.0      | 14   |
| OZG-800                          | nitrobenzene        | aniline        | H <sub>2</sub>                                  | 170/3                                       | 26   | 94.1      | 15   |
| CN-900                           | nitrobenzene        | aniline        | HCOOH                                           | 160                                         | 12   | 68.5      | 16   |

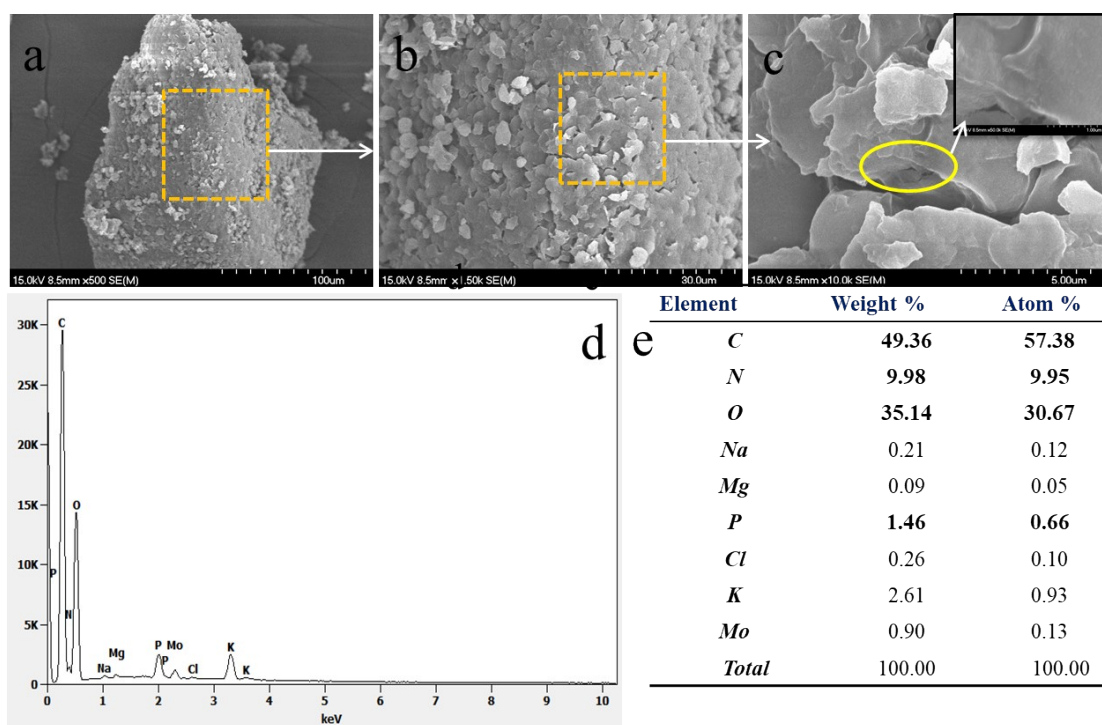

Fig. S1 SEM image (a-c) and EDS element analysis (de) of yeasts after adding water.

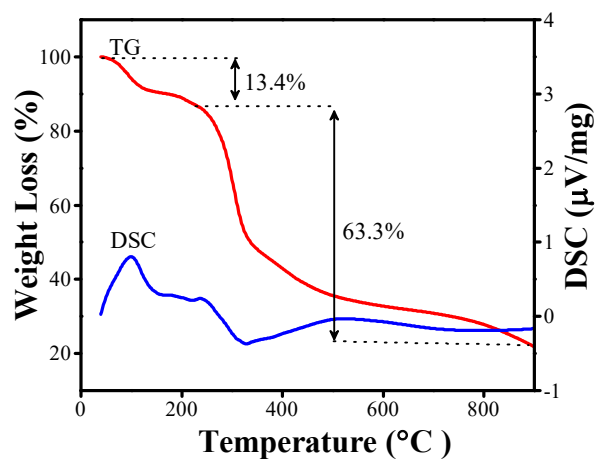

Fig. S2 TG-DSC curve of yeast.

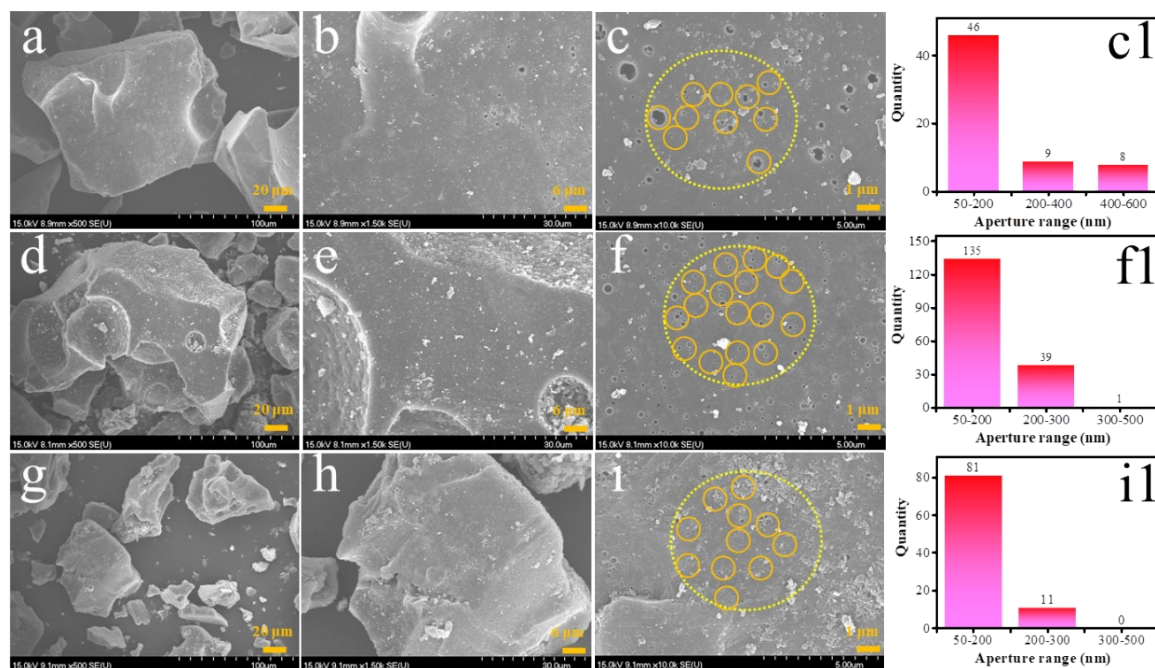

Fig. S3 SEM images and macropore size distribution of the catalysts (Y-NPC-800 °C (a-c, c1); Y-NPC-900 °C (d-f, f1); Y-NPC-950 °C (g-i, i1)).

Table S2 Surface area ( $S_{\text{BET}}$ ), pore volume and average pore size values of the samples

| Samples      | $S_{\text{BET}}$ ( $\text{m}^2\text{g}^{-1}$ ) | Total pore volume <sup>a</sup><br>( $\text{cm}^3\text{g}^{-1}$ ) | BJH desorption average pore size (nm) |
|--------------|------------------------------------------------|------------------------------------------------------------------|---------------------------------------|
| Y-NPC-800 °C | 226                                            | 0.13                                                             | 4.5                                   |
| Y-NPC-900 °C | 255                                            | 0.16                                                             | 4.7                                   |
| Y-NPC-950 °C | 355                                            | 0.23                                                             | 4.8                                   |

<sup>a</sup> Single point adsorption total pore volume of pores less than 196.2 nm diameter at P/P<sub>0</sub> 0.99.

Table S3 Crystal plane spacing and full width at half maximum (FWHM) of the samples<sup>17</sup>

| Samples      | $2\theta$ (°) | d-spacing of (002) (nm) | FWHM (nm) | $2\theta$ (°) | d-spacing of (100) (nm) | FWHM (nm) |
|--------------|---------------|-------------------------|-----------|---------------|-------------------------|-----------|
| Y-NPC-800 °C | 25.056        | 0.355                   | 0.655     | 44.497        | 0.206                   | 0.281     |
| Y-NPC-900 °C | 25.311        | 0.352                   | 0.555     | 43.433        | 0.203                   | 0.185     |
| Y-NPC-950 °C | 24.577        | 0.361                   | 0.512     | 43.425        | 0.208                   | 0.687     |

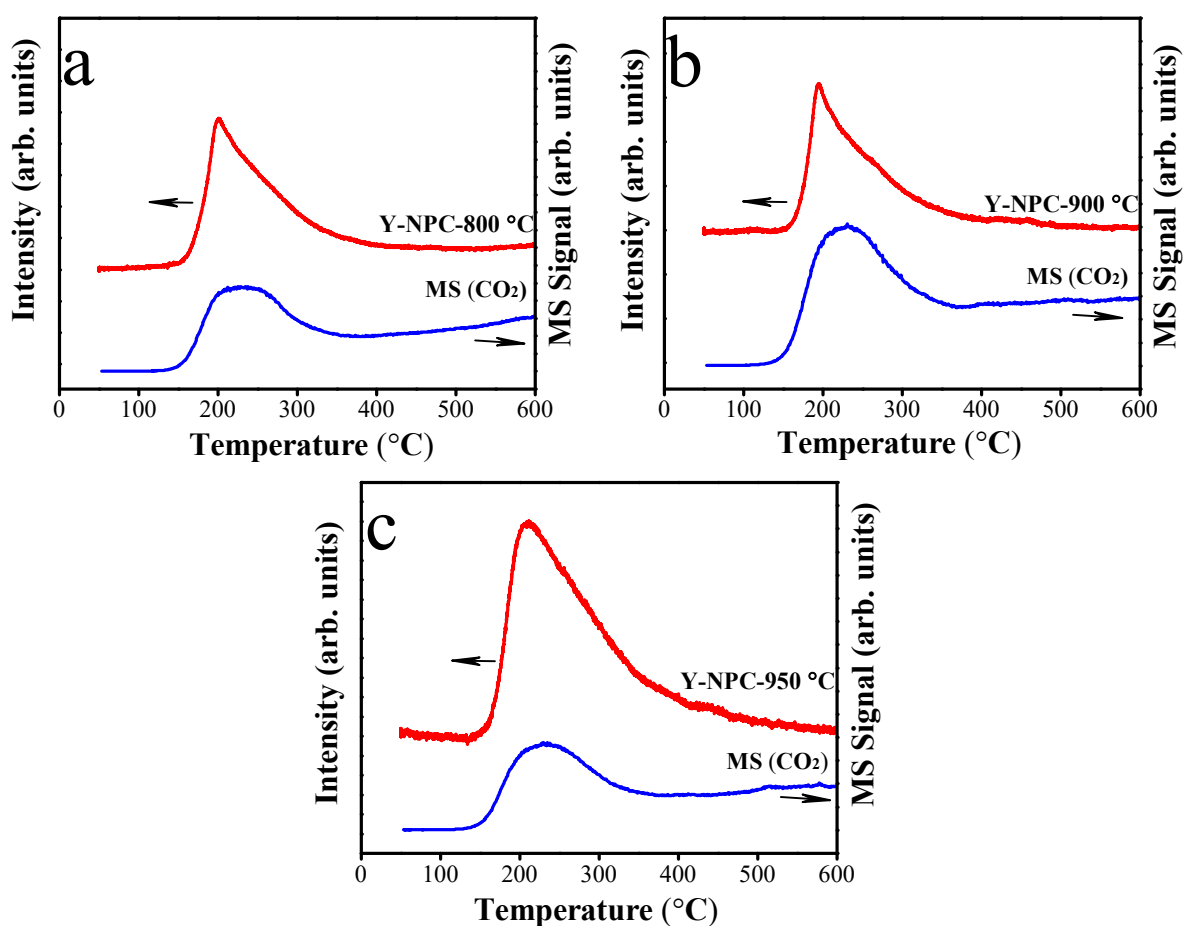

Fig. S4 CO<sub>2</sub>-TPD profiles associated with the samples and CO<sub>2</sub>-TPD profiles with MS of the samples (a-c).

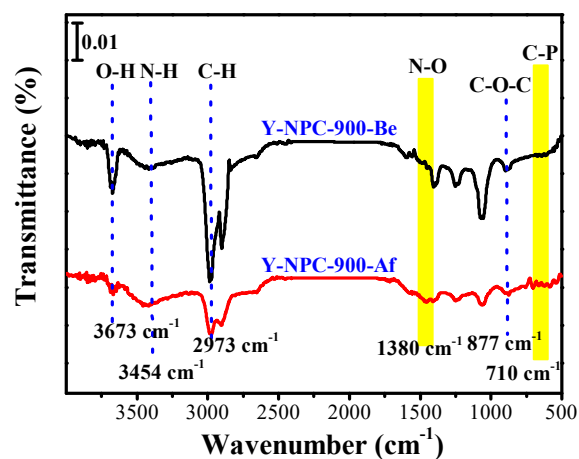

Fig. S5 FTIR spectra of Y-NPC-900 °C.

Table S4 Elemental analysis of the samples by XPS

| Atomic Content% | C     | O     | N    | P    | N-Q  | P-O  | P-C  | P-N  |
|-----------------|-------|-------|------|------|------|------|------|------|
| Y-NPC-800 °C    | 80.09 | 14.87 | 4.39 | 0.65 | 2.23 | 0.12 | 0.46 | 0.07 |
| Y-NPC-900 °C    | 87.30 | 9.16  | 3.17 | 0.37 | 1.68 | 0.09 | 0.15 | 0.13 |
| Y-NPC-950 °C    | 88.24 | 9.20  | 2.36 | 0.24 | 1.25 | 0.05 | 0.11 | 0.08 |

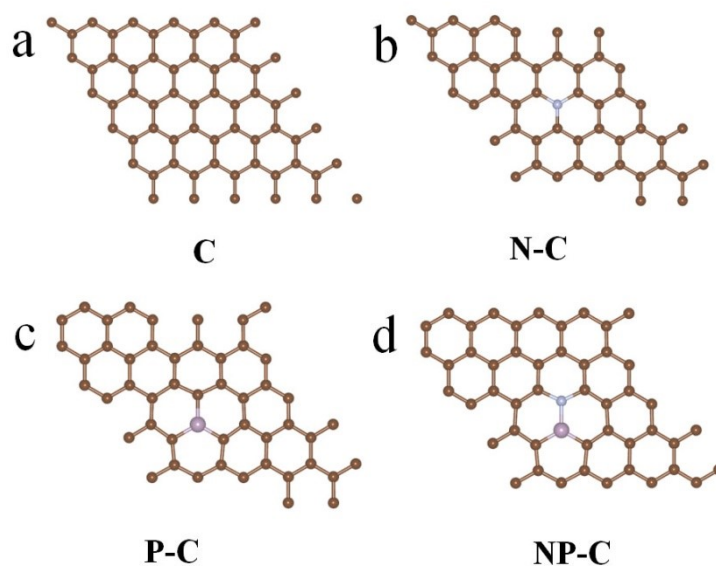

Fig. S6 Structures of C, N-C, P-C and NP-C (a-d) contain 50 carbon atoms, 1 nitrogen atom and 1 phosphorus atom. Carbon: brown, nitrogen: light blue, and phosphorus: purple.

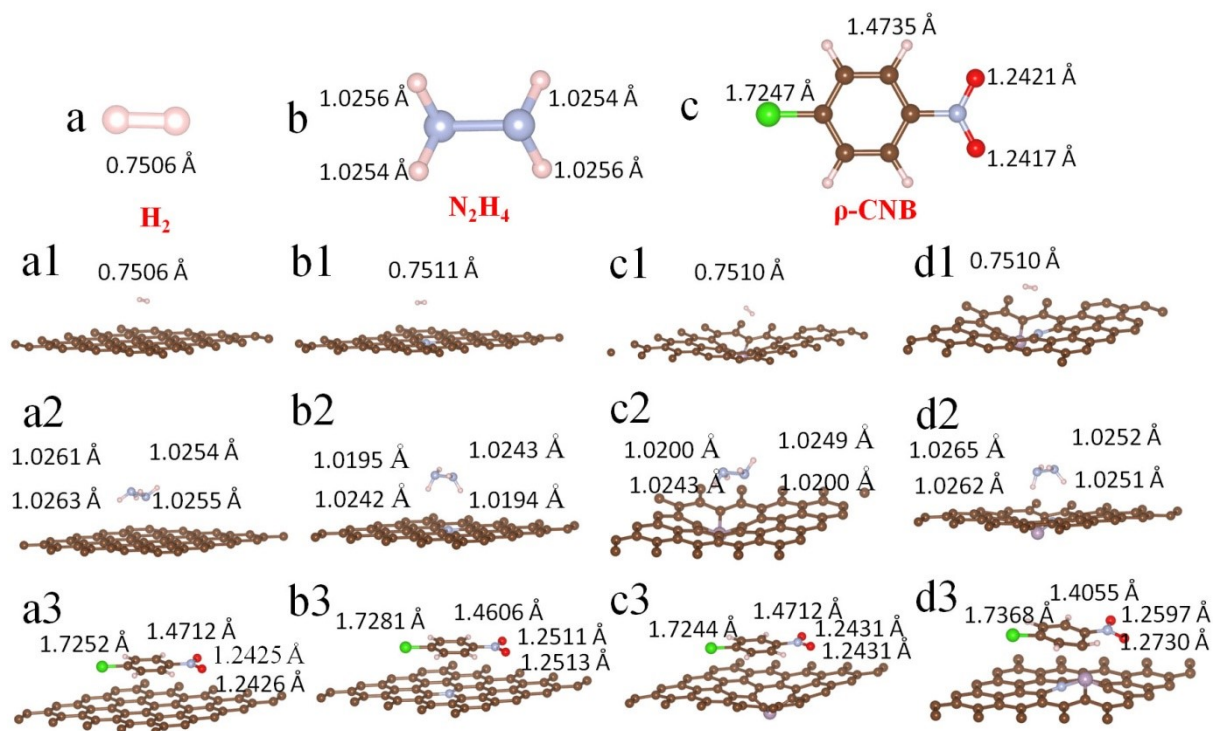

Fig. S7 Optimized free molecules for H<sub>2</sub>(a), N<sub>2</sub>H<sub>4</sub> (b)and ρ-CNB(c); adsorption model of H<sub>2</sub>, N<sub>2</sub>H<sub>4</sub>, ρ-CNB molecules over C-C (a1, a2, a3), N-C (b1, b2, b3), P-C (c1, c2, c3) and NP-C (d1, d2, d3), respectively.

Table S5 Adsorption energy of H<sub>2</sub> over C-C, N-C, P-C and NP-C

| System | *       | H <sub>2</sub> | *H <sub>2</sub> | ΔE <sub>ads</sub> (eV) |
|--------|---------|----------------|-----------------|------------------------|
| C      | -462.31 | -6.77          | -469.14         | -0.06                  |
| N-C    | -460.20 | -6.77          | -467.05         | -0.08                  |
| P-C    | -453.72 | -6.77          | -462.40         | -1.91                  |
| NP-C   | -452.24 | -6.77          | -461.99         | -2.98                  |

Table S6 Adsorption energy of N<sub>2</sub>H<sub>4</sub> over C-C, N-C, P-C and NP-C

| System | *       | N <sub>2</sub> H <sub>4</sub> | *N <sub>2</sub> H <sub>4</sub> | ΔE <sub>ads</sub> (eV) |
|--------|---------|-------------------------------|--------------------------------|------------------------|
| C      | -462.31 | -30.18                        | -492.70                        | -0.21                  |
| N-C    | -460.20 | -30.18                        | -490.70                        | -0.32                  |
| P-C    | -453.72 | -30.18                        | -486.02                        | -2.12                  |
| NP-C   | -452.24 | -30.18                        | -485.71                        | -3.29                  |

Table S7 Adsorption energy of  $\rho$ -CNB over C-C, N-C, P-C and NP-C

| System | *       | $\rho$ -CNB | * $\rho$ -CNB | $\Delta E_{\text{ads}}$ (eV) |
|--------|---------|-------------|---------------|------------------------------|
| C      | -462.31 | -90.16      | -553.11       | -0.64                        |
| N-C    | -460.20 | -90.16      | -551.06       | -0.70                        |
| P-C    | -453.72 | -90.16      | -546.40       | -2.52                        |
| NP-C   | -452.24 | -90.16      | -544.93       | -2.53                        |

Table S8 Catalytic transfer hydrogenation performance of catalyst<sup>a</sup>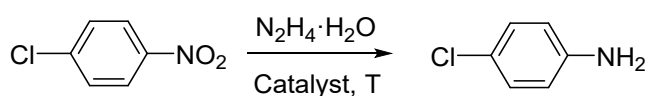

| Entry             | Catalyst                        | m<br>Catalyst(mg) | S <sub>BET</sub><br>(m <sup>2</sup> ·g <sup>-1</sup> ) | T(°C) | $\rho$ -CNB<br>Con.(%) | $\rho$ -CAN<br>Sel.(%) | PR <sup>b</sup> (molg <sup>-1</sup><br>h <sup>-1</sup> ) | PR <sup>b</sup> /S <sub>BET</sub><br>(molh <sup>-1</sup> m <sup>-2</sup> ) | PR <sup>b</sup> /S <sub>BET</sub> P-<br>N <sup>c</sup> (molh <sup>-1</sup> m <sup>-2</sup> ) |
|-------------------|---------------------------------|-------------------|--------------------------------------------------------|-------|------------------------|------------------------|----------------------------------------------------------|----------------------------------------------------------------------------|----------------------------------------------------------------------------------------------|
| 1 <sup>11</sup>   | --                              | --                | --                                                     | 100   | 1.2                    | 99                     | --                                                       | --                                                                         | --                                                                                           |
| 2 <sup>11</sup>   | NC-700                          | 40                | 601                                                    | 100   | 100                    | 83.2                   | 4.2×10 <sup>-3</sup>                                     | 6.9×10 <sup>-6</sup>                                                       | /                                                                                            |
| 3 <sup>11</sup>   | Graphite                        | 40                | /                                                      | 100   | 30.2                   | >99                    | 1.1×10 <sup>-3</sup>                                     | /                                                                          | /                                                                                            |
| 4 <sup>11</sup>   | CNTs                            | 40                | /                                                      | 100   | 27.7                   | >99                    | 9.9×10 <sup>-4</sup>                                     | /                                                                          | /                                                                                            |
| 5 <sup>11</sup>   | g-C <sub>3</sub> N <sub>4</sub> | 40                | /                                                      | 100   | 42.5                   | >99                    | 1.5×10 <sup>-3</sup>                                     | /                                                                          | /                                                                                            |
| 6                 | CSs                             | 40                | 4.3                                                    | 100   | 12.8                   | >99                    | 6.4×10 <sup>-4</sup>                                     | 1.4×10 <sup>-4</sup>                                                       | /                                                                                            |
| 7                 | Y-NPC-800 °C                    | 40                | 226                                                    | 100   | 46.7                   | 91.8                   | 2.1×10 <sup>-3</sup>                                     | 0.9×10 <sup>-5</sup>                                                       | 1.3×10 <sup>-4</sup>                                                                         |
| 8                 | Y-NPC-900 °C                    | 40                | 255                                                    | 100   | 100                    | >99.0                  | 5.0×10 <sup>-3</sup>                                     | 2.0×10 <sup>-5</sup>                                                       | 1.5×10 <sup>-4</sup>                                                                         |
| 9                 | Y-NPC-950 °C                    | 40                | 354                                                    | 100   | 75.4                   | 98.4                   | 3.8×10 <sup>-3</sup>                                     | 1.0×10 <sup>-5</sup>                                                       | 1.3×10 <sup>-4</sup>                                                                         |
| 10                | Y-NPC-900 °C                    | 40                | 255                                                    | 90    | 96.0                   | >99.0                  | 4.8×10 <sup>-3</sup>                                     | 1.9×10 <sup>-5</sup>                                                       | 1.5×10 <sup>-4</sup>                                                                         |
| 11                | Y-NPC-900 °C                    | 40                | 255                                                    | 80    | 90.0                   | >99.0                  | 4.5×10 <sup>-3</sup>                                     | 1.8×10 <sup>-5</sup>                                                       | 1.4×10 <sup>-4</sup>                                                                         |
| 12                | Y-NPC-900 °C                    | 40                | 255                                                    | 60    | 44.6                   | >99.0                  | 3.0×10 <sup>-3</sup>                                     | 1.2×10 <sup>-5</sup>                                                       | 9.2×10 <sup>-5</sup>                                                                         |
| 13                | Y-NPC-900 °C                    | 20                | 255                                                    | 100   | 79.2                   | >99.0                  | 7.9×10 <sup>-3</sup>                                     | 3.0×10 <sup>-5</sup>                                                       | 2.3×10 <sup>-4</sup>                                                                         |
| 14 <sup>18d</sup> | 1.36%Pd/CSs                     | 0.53              | /                                                      | 80    | 100                    | 86.2                   | 1.1×10 <sup>-2</sup>                                     | /                                                                          | /                                                                                            |

<sup>a</sup> Reaction conditions: 0.5 mmol reactant, 5 mmol hydrazine hydrate (N<sub>2</sub>H<sub>4</sub>·H<sub>2</sub>O, 85 wt.%), 40 mg Y-NPC-900 °C, 4 mL solvent (V<sub>ethanol</sub>/V<sub>water</sub> = 1/3), 100 °C, 2.5 h.

<sup>b</sup> Production rate per catalyst weight (PR) = mole of converted substrate ×  $\rho$ -CAN Sel. (%) / g catalyst × h reaction time (mol g<sup>-1</sup>h<sup>-1</sup>).

<sup>c</sup> The P-N content is in Table S4.

<sup>d</sup> Reaction conditions: substrate (1 mmol), hydrazine hydrate (10 mmol), 1.36 wt.% Pd (5 × 10<sup>-4</sup> mmol), solvent (ethanol/H<sub>2</sub>O: 1 mL/1 mL), air, 1.5 h.

Table S9 The catalytic performance of Y-NPC-900 °C for the transfer hydrogenation of halonitrobenzenes

| Entry | Substrate                                                                           | Product                                                                              | Con. (%) | Sel. (%) |
|-------|-------------------------------------------------------------------------------------|--------------------------------------------------------------------------------------|----------|----------|
| 1     | 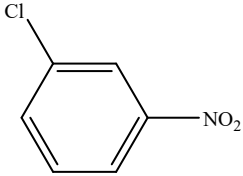   |    | 96.7     | >99.9    |
| 2     |    |    | 99.3     | >99.9    |
| 3     |    |    | 98.0     | 97.1     |
| 4     |   |   | 83.1     | 98.9     |
| 5     |  |  | 82.5     | 97.2     |
| 6     |  |  | 100      | 80.2     |

Reaction conditions: 0.5 mmol reactant, 5 mmol hydrazine hydrate ( $\text{N}_2\text{H}_4\cdot\text{H}_2\text{O}$ , 85 wt.%), 40 mg Y-NPC-900 °C, 4 mL solvent ( $V_{\text{ethanol}}/V_{\text{water}} = 1/3$ ), 100 °C, 2.5 h.



## References

1. D. H. S. Byung Hee Ha, Sung Yun Cho, *Tetrahedron Letters*, 1985, **26**, 6233-6234.
2. L. Pacosová, C. Kartusch, P. Kukula and J. A. van Bokhoven, *ChemCatChem*, 2010, **3**, 154-156.
3. S.-i. Fujita, H. Watanabe, A. Katagiri, H. Yoshida and M. Arai, *Journal of Molecular Catalysis A: Chemical*, 2014, **393**, 257-262.
4. Y. Sun, C. Cao, C. Liu, J. Liu, Y. Zhu, X. Wang and W. Song, *Carbon*, 2017, **125**, 139-145.
5. C. Liao, B. Liu, Q. Chi and Z. Zhang, *ACS applied materials & interfaces*, 2018, **10**, 44421-44429.
6. X. S. Peng Zhang, Chang Yu, Jianzhou Gui, and Jieshan Qiu, *ACS Sustainable Chem. Eng.*, 2017, **5**, 7481-7485.
7. S. Liu, L. Cui, Z. Peng, J. Wang, Y. Hu, A. Yu, H. Wang, P. Peng and F. F. Li, *Nanoscale*, 2018, **10**, 21764-21771.
8. J. Xi, Q. Wang, J. Liu, L. Huan, Z. He, Y. Qiu, J. Zhang, C. Tang, J. Xiao and S. Wang, *Journal of Catalysis*, 2018, **359**, 233-241.
9. G. Xiao, P. Li, Y. Zhao, S. Xu and H. Su, *Chemistry-An Asian Journal*, 2018, DOI: 10.1002/asia.201800515.
10. Y. Zhang, Y. Zhai, M. Chu, L. Huo, H. Wang and Y. Gao, *Asian Journal of Organic Chemistry*, 2018, **7**, 1107-1112.
11. X. Hu, Y. Long, M. Fan, M. Yuan, H. Zhao, J. Ma and Z. Dong, *Applied Catalysis B: Environmental*, 2019, **244**, 25-35.
12. Q. Wei, F. Qin, Q. Ma and W. Shen, *Carbon*, 2019, **141**, 542-552.
13. H. Zhang, C. Zhang, Y. Zhang, P. Cui, Y. Zhang, L. Wang, H. Wang and Y. Gao, *Applied Surface Science*, 2019, **487**, 616-624.
14. X. Chen, Q. Shen, Z. Li, W. Wan, J. Chen and J. Zhang, *ACS applied materials & interfaces*, 2020, **12**, 654-666.
15. D. Han, Y. Liu, Y. Lv, W. Xiong, F. Hao, H. Luo and P. Liu, *Carbon*, 2023, **203**, 347-356.
16. Z. Xia, B. Wang, J. Li, F. Zhang, L. Chen and Y. Li, *New Journal of Chemistry*, 2023, **47**, 5621-5624.
17. G. Pari, S. Darmawan and B. Prihandoko, *Procedia Environmental Sciences*, 2014, **20**, 342-351.
18. Y.-M. Lu, H.-Z. Zhu, W.-G. Li, B. Hu and S.-H. Yu, *Journal of Materials Chemistry A*, 2013, **1**, 3783.
